# Supplementary material for: Ionic Liquid Solutions as a Green Tool for the Extraction and Isolation of Natural Products
Source: PubMed Central journal article supplement (PMC6100307; doi:10.3390/molecules23071765), 2018-07-18
Supplement: molecules-23-01765-s001.pdf [file molecules-23-01765-s001.pdf]

Review

# Ionic Liquid Solutions as a Green Tool for the Extraction and Isolation of Natural Products

Jiao Xiao, Gang Chen and Ning Li \*

School of Traditional Chinese Materia Medica, Shenyang Pharmaceutical University, Wenhua Road 103, Shenyang 110016, China; xj110121@126.com (J.X.); chengang1152001@163.com (G.C.)

\* Correspondence: liningsypharm@163.com; Tel.: +86-24-2398-6475; Fax: +86-24-3150-9368

Received: 11 June 2018; Accepted: 14 July 2018; Published: date

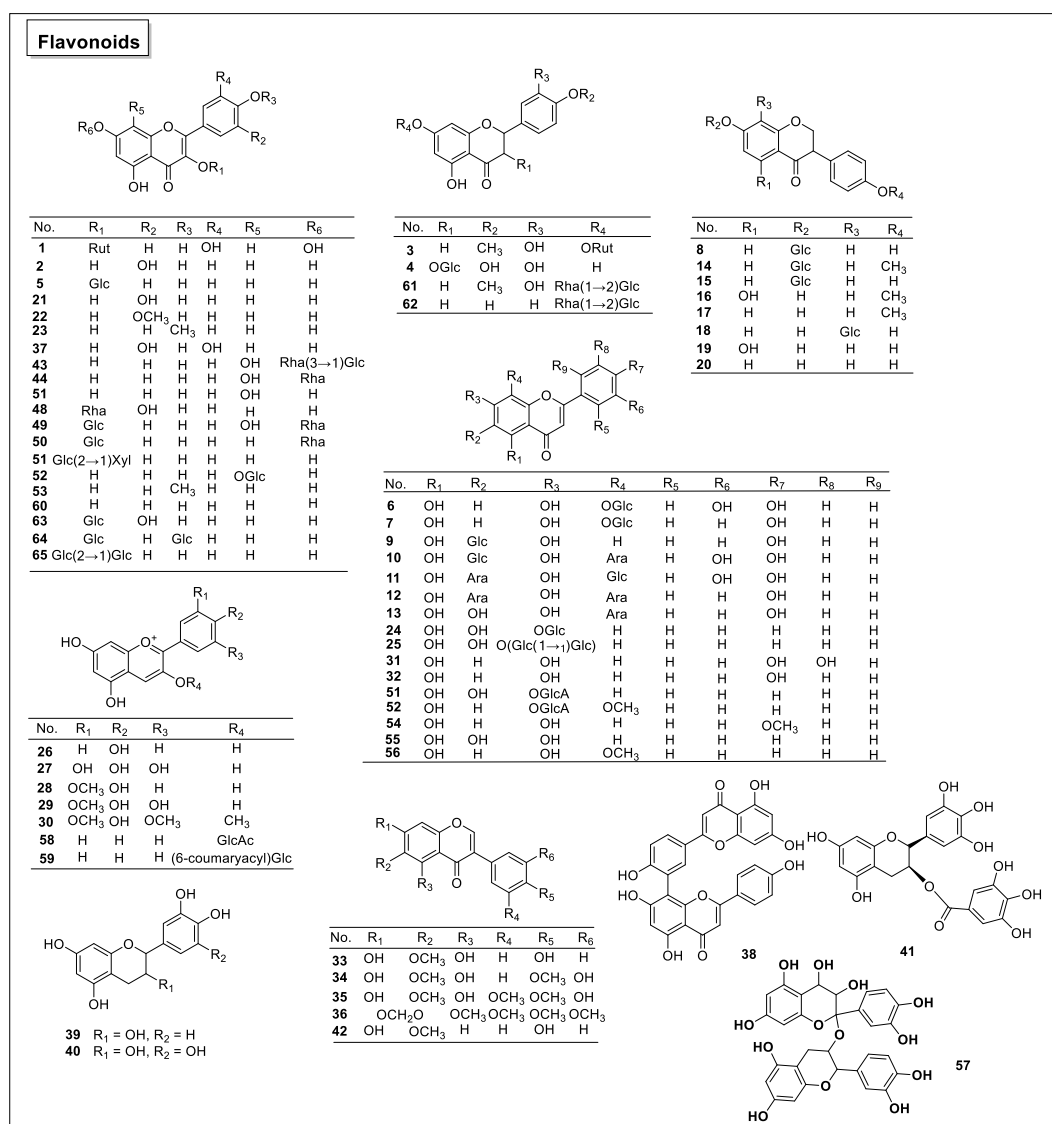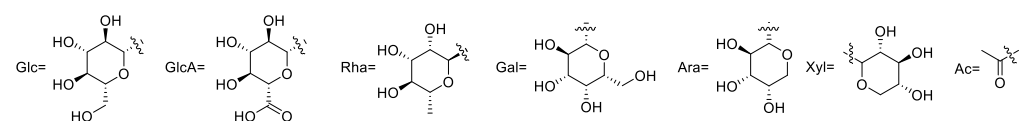

Figure S1. The structures of flavonoids extracted from natural sources using ILs or IL solutions.

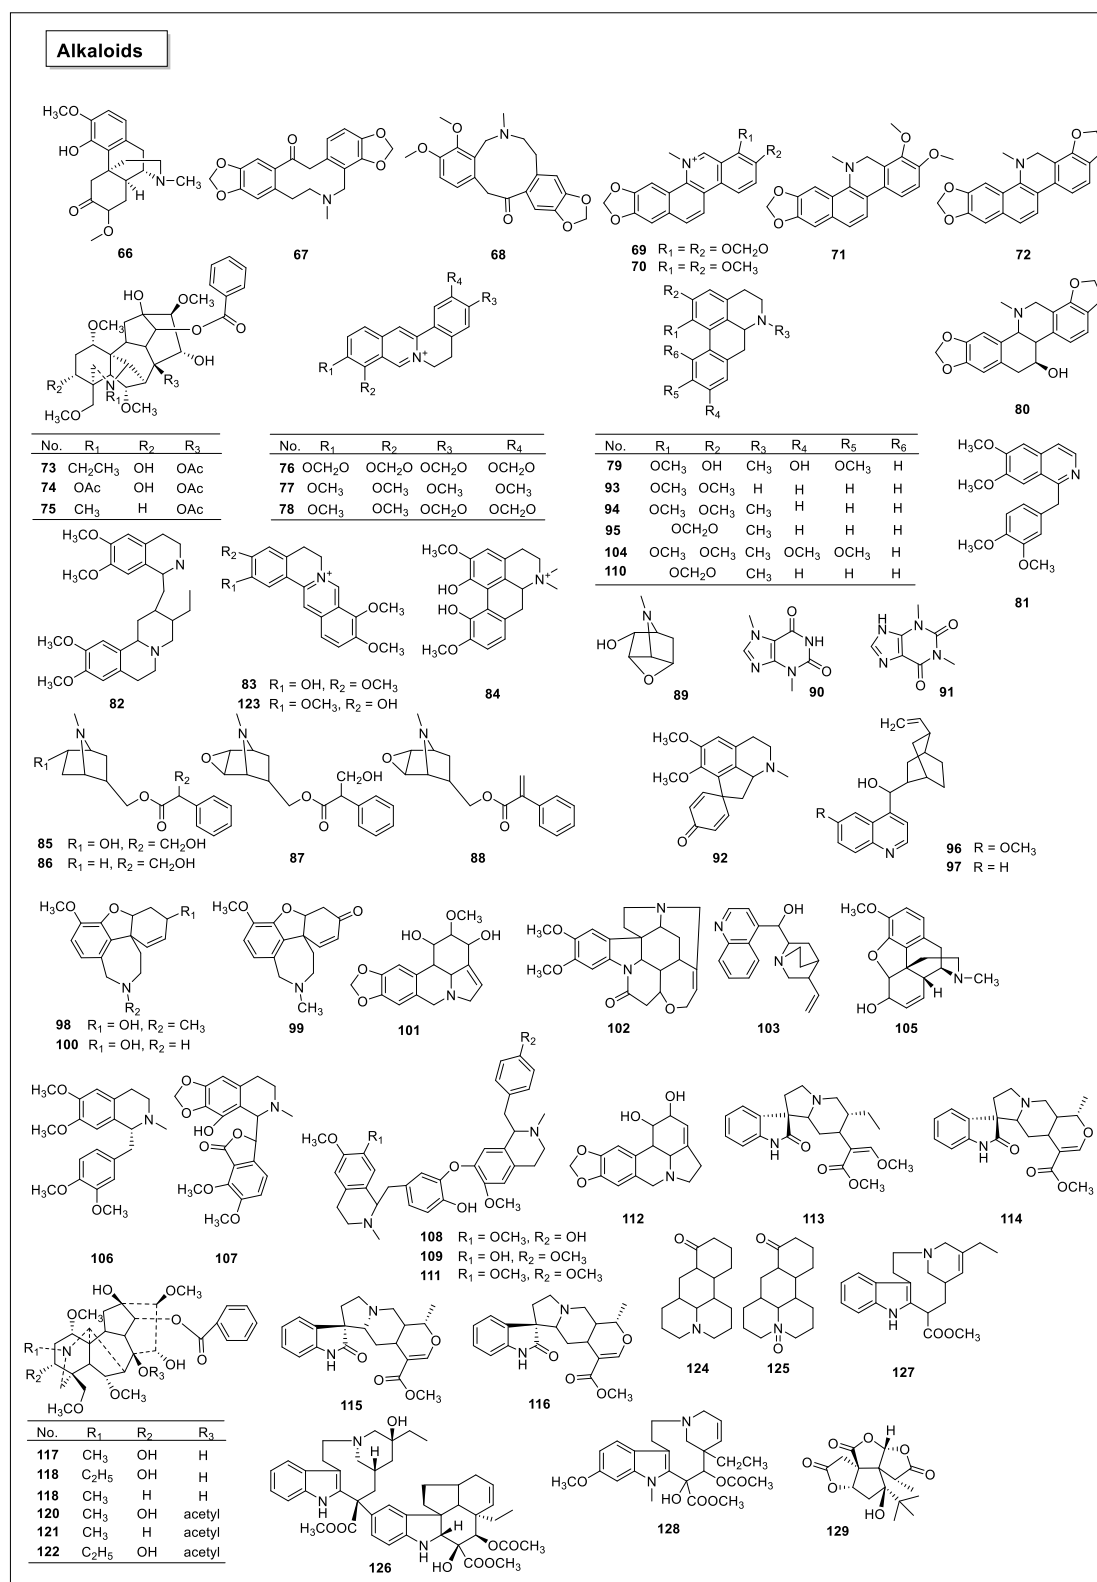

**Figure S2.** The structures of alkaloids extracted from natural sources using ILs or IL solutions.

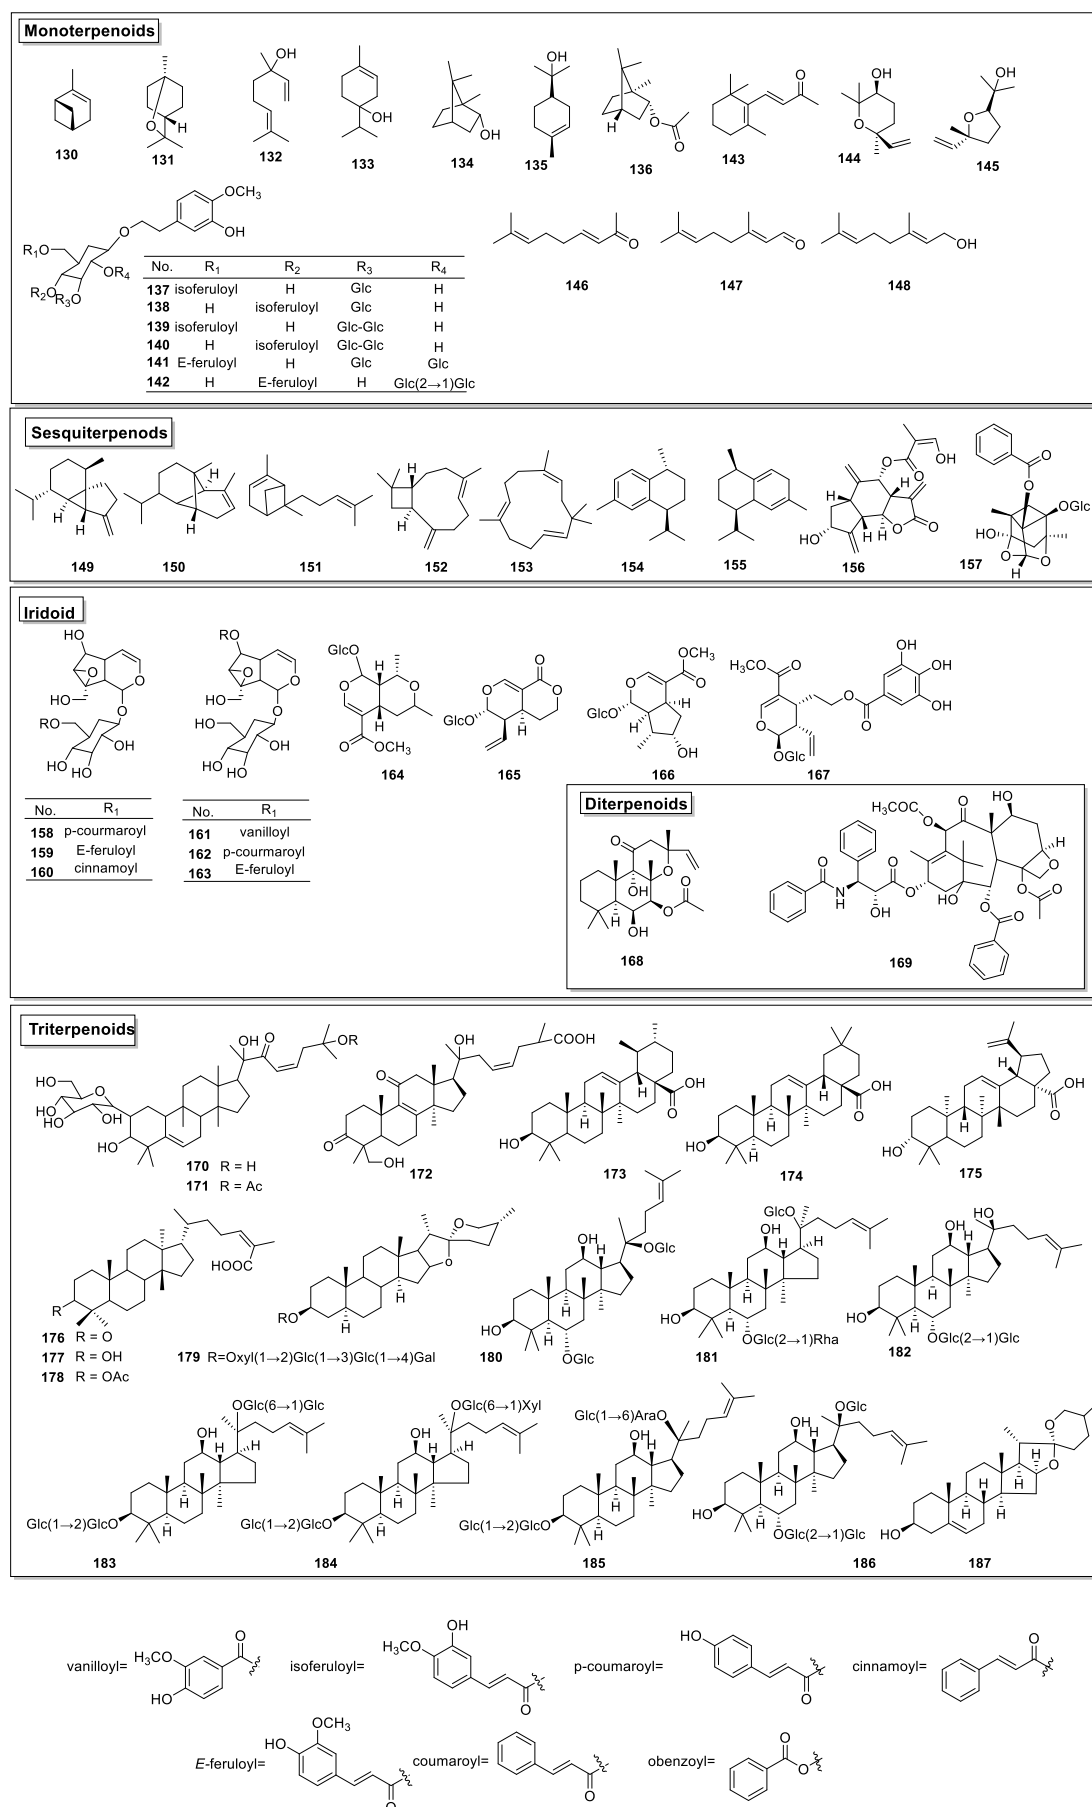

**Figure S3** The structures of terpenoids extracted from natural sources using ILs or IL solutions.

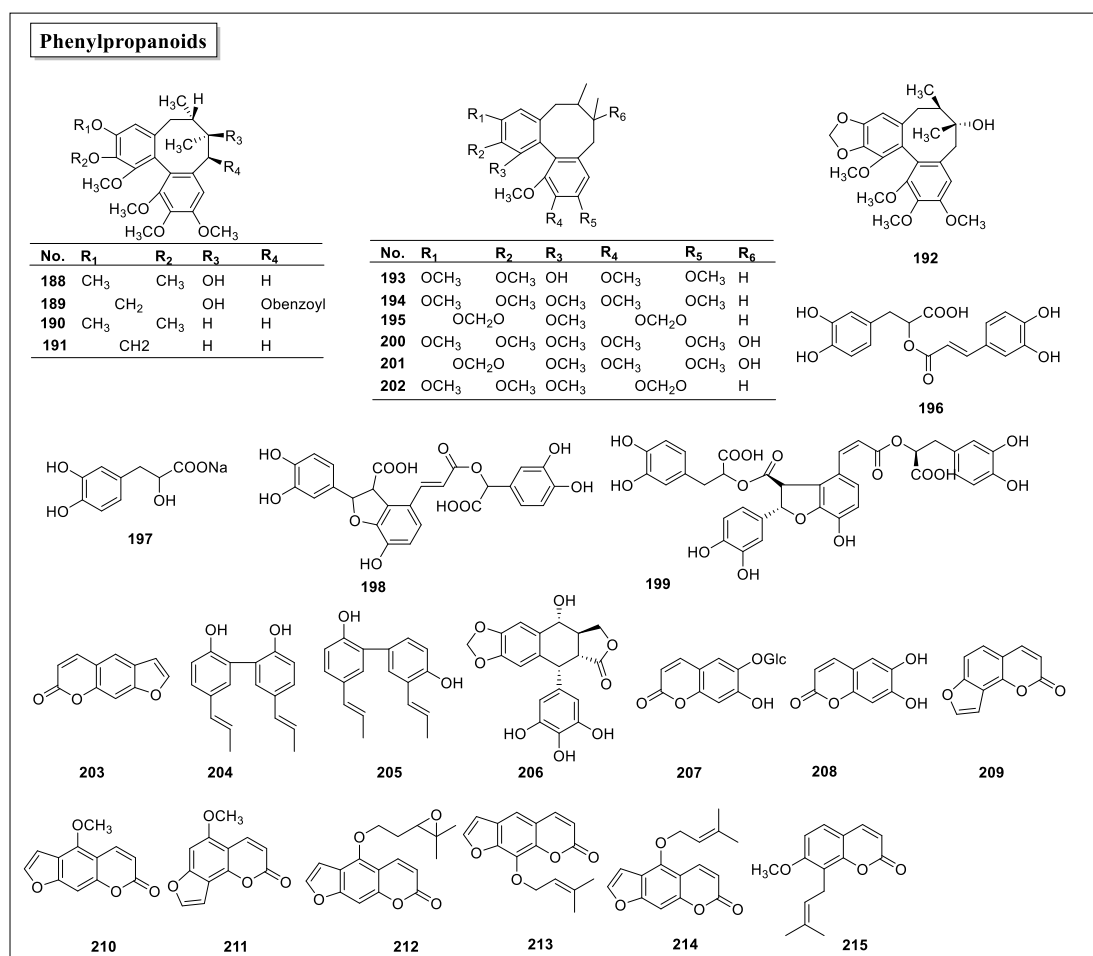

**Figure S4.** The structures of phenylpropanoids extracted from natural sources using ILs or IL solutions.

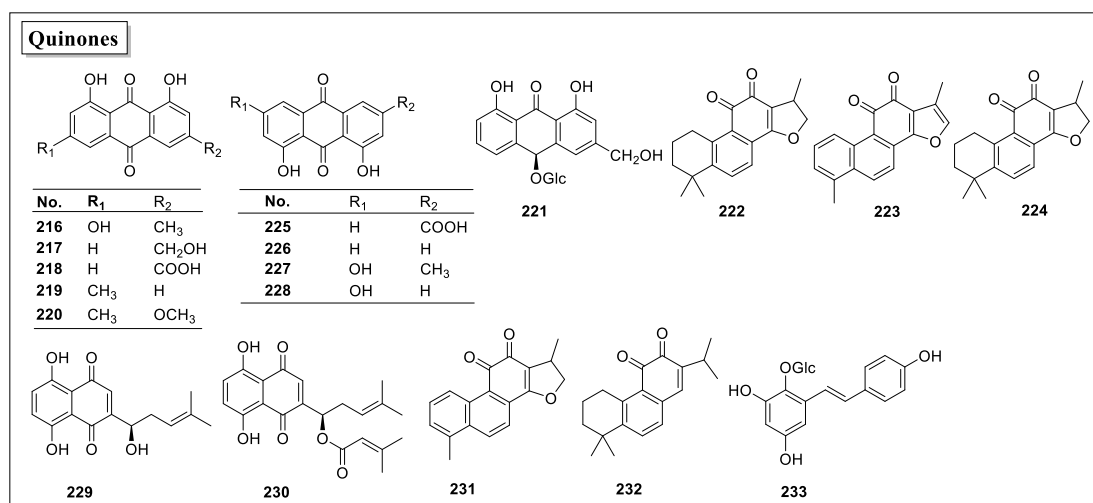

**Figure S5.** The structures of quinones extracted from natural sources using ILs or IL solutions.

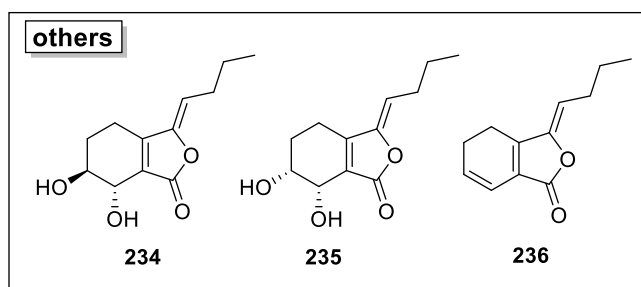

**Figure S6.** The structures of other compounds extracted from natural sources using ILs or IL solutions.
